# Supplementary material for: Palmitoyl-L-carnitine induces tau phosphorylation and mitochondrial dysfunction in neuronal cells
Source: PubMed Central journal article supplement (PMC11560007; doi:10.1371/journal.pone.0313507), 2024-11-13
Supplement: pone.0313507.s001.pdf [file pone.0313507.s001.pdf]

# **Supplementary information**

## **Palmitoyl-L-carnitine induces tau phosphorylation and mitochondrial dysfunction in neuronal cells**

Gwangho Yoon, Min Kyoung Kam, Young Ho Koh, and Chulman Jo\*

**This S1 File contains uncropped full blots**

# A. Full scans of uncropped blots (For Fig 2)

**pTau (T181)**

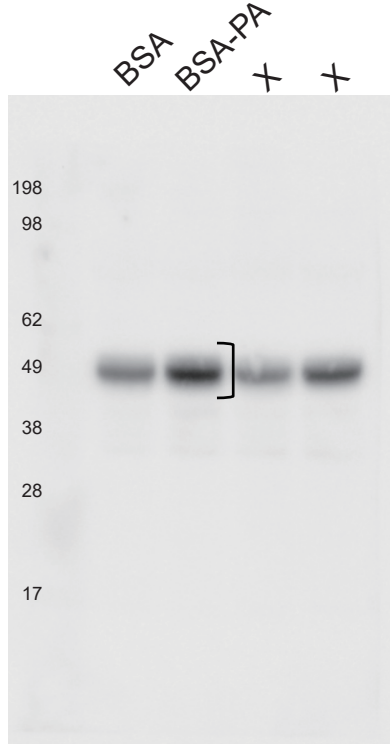

**pTau (S262)**

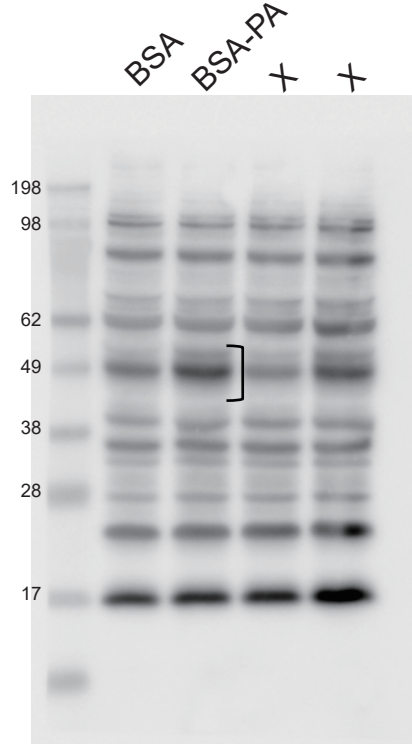

**PHF-1**

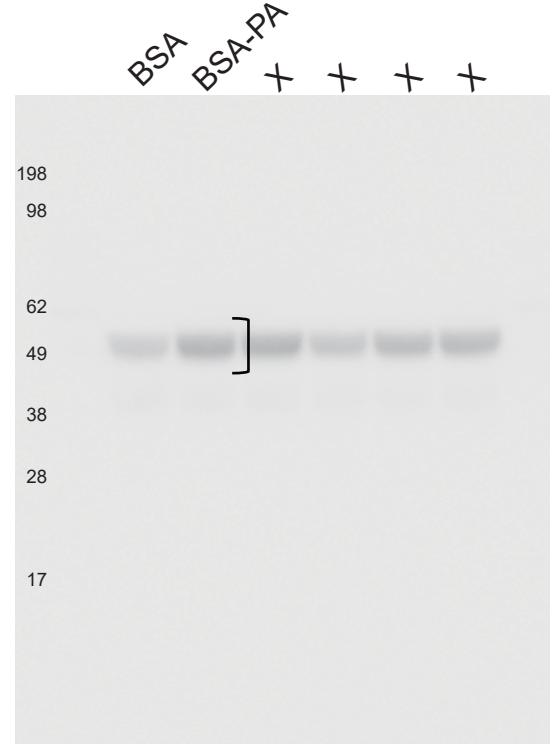

] Cropped region

**Total tau**

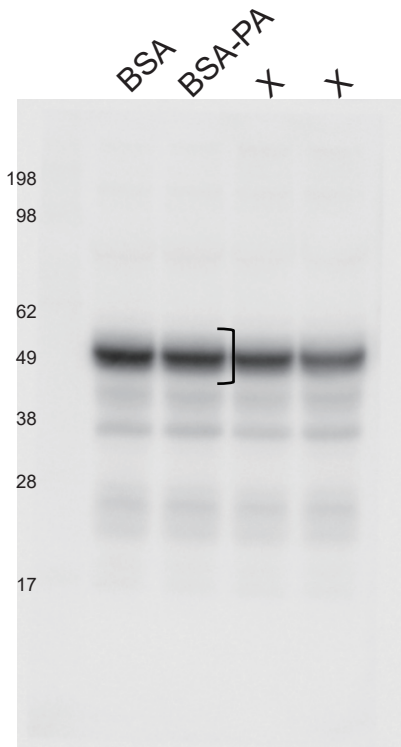

**Actin**

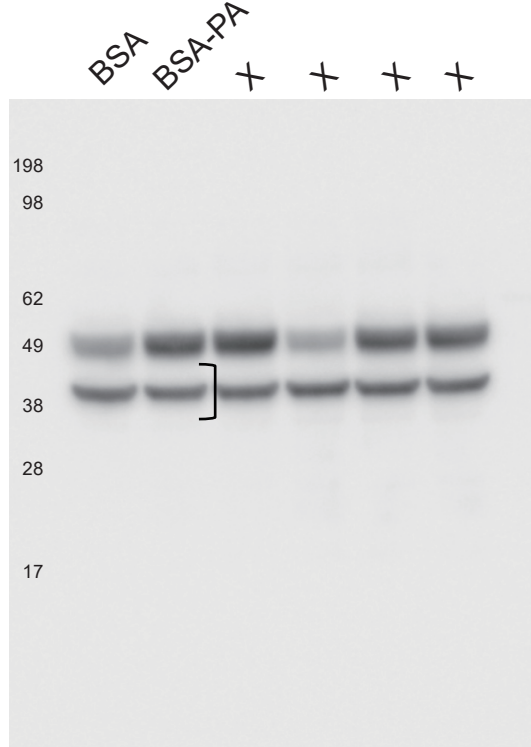

] Cropped region

## B. Full scans of uncropped blots (For Fig 3)

For Fig3A

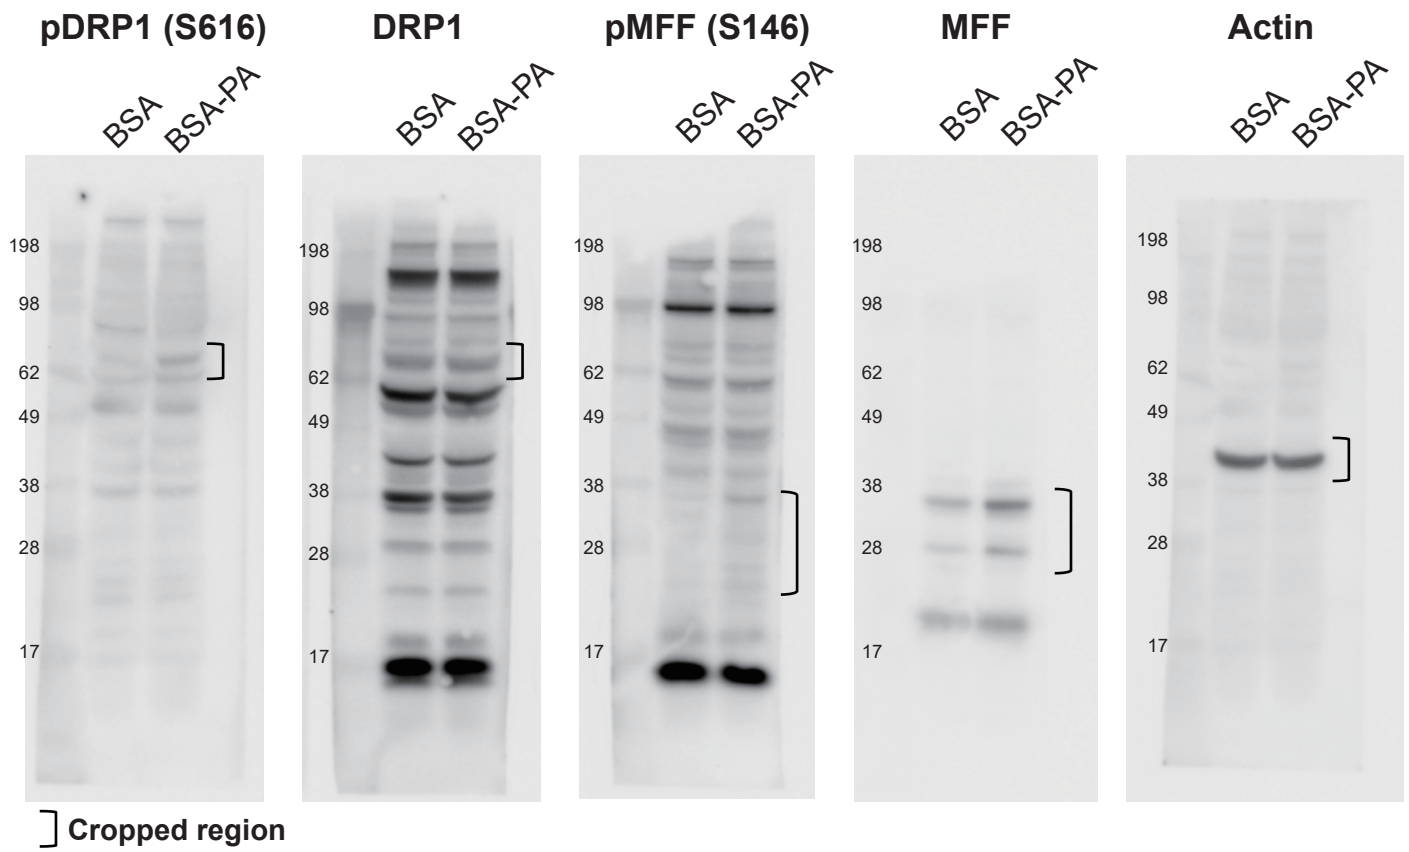

For Fig3C

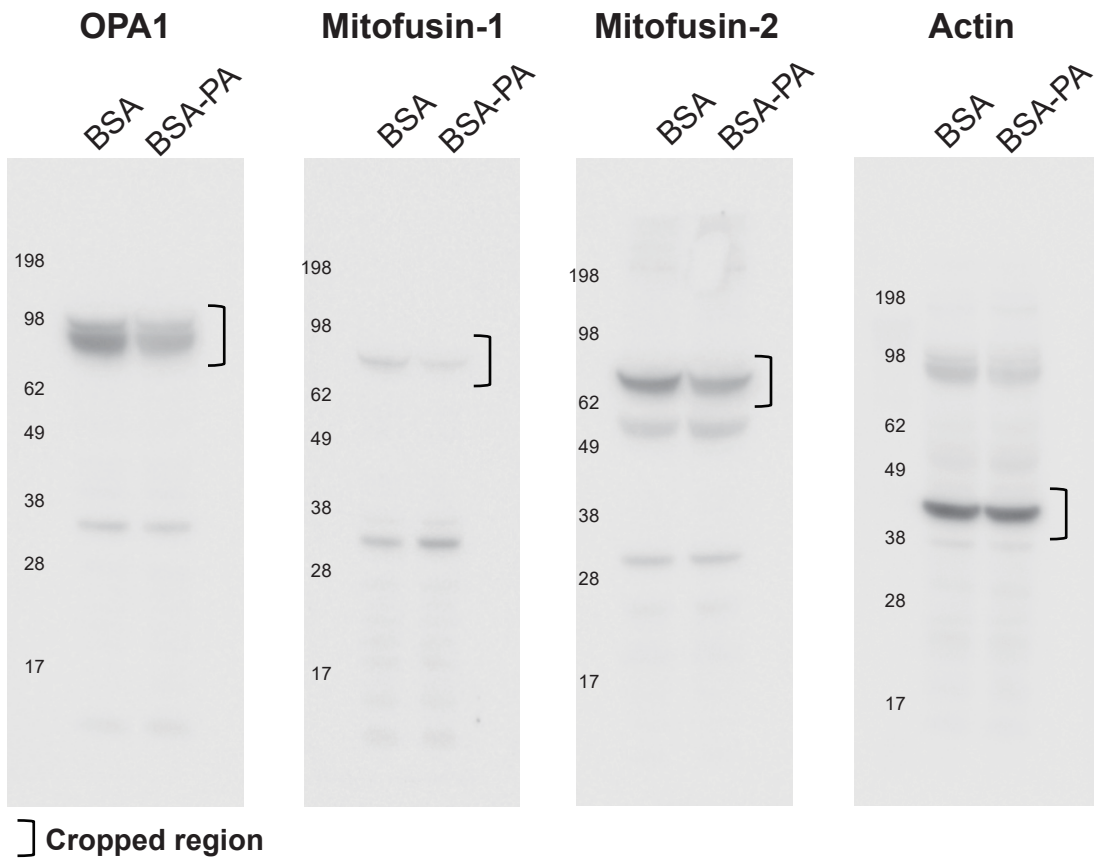

# C. Full scans of uncropped blots (For Fig 5A)

**p-GSK-3 $\beta$  (S9)**

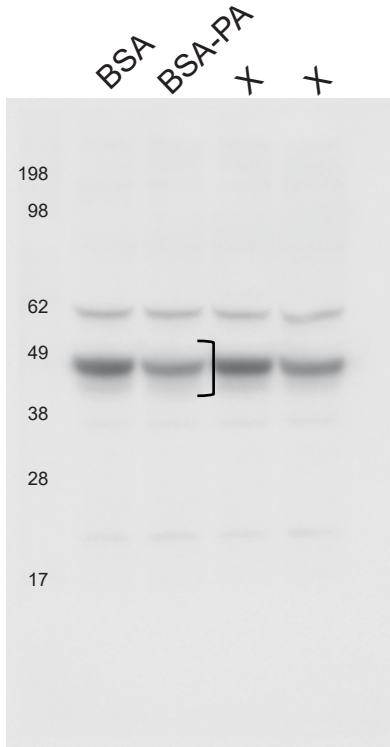

**GSK-3 $\beta$**

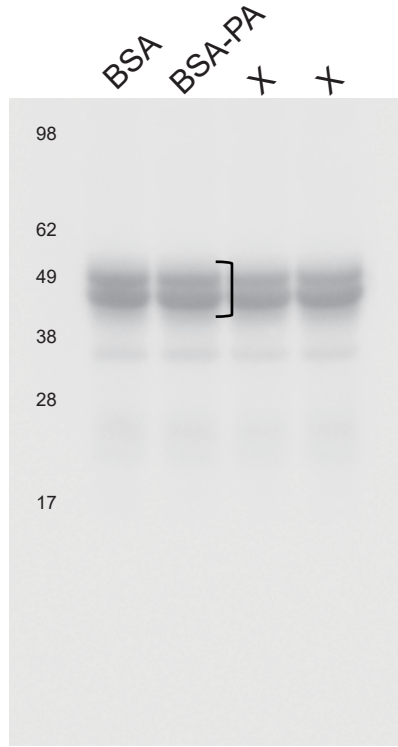

**CDK5**

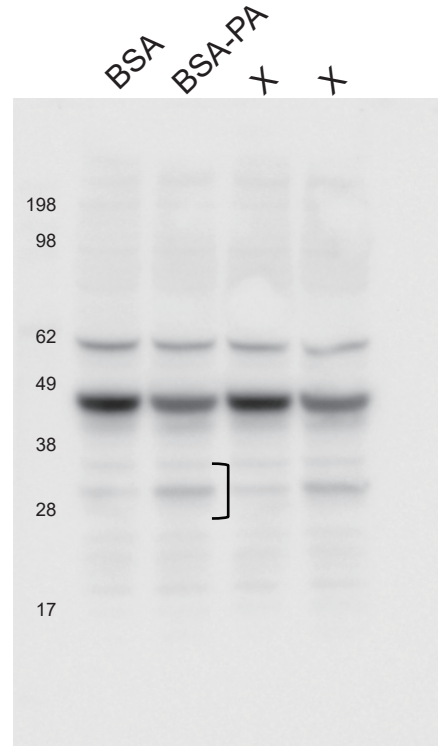

**p25**

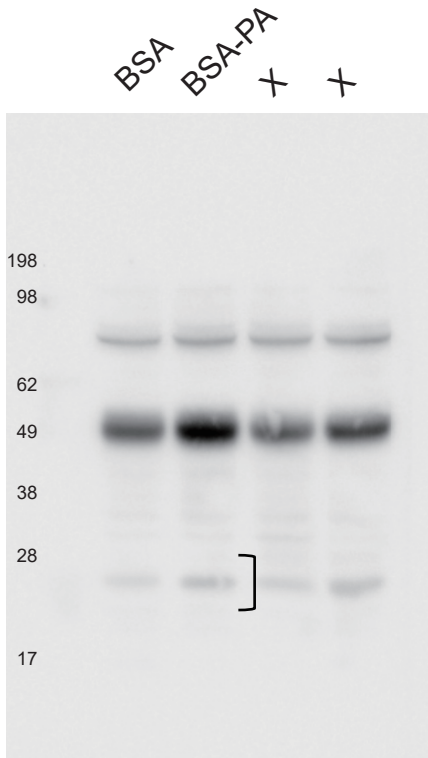

**Actin**

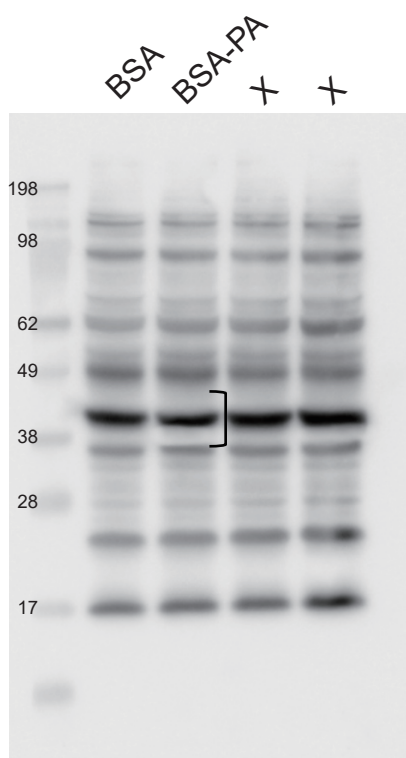

## D. Full scans of uncropped blots (For Fig 5B)

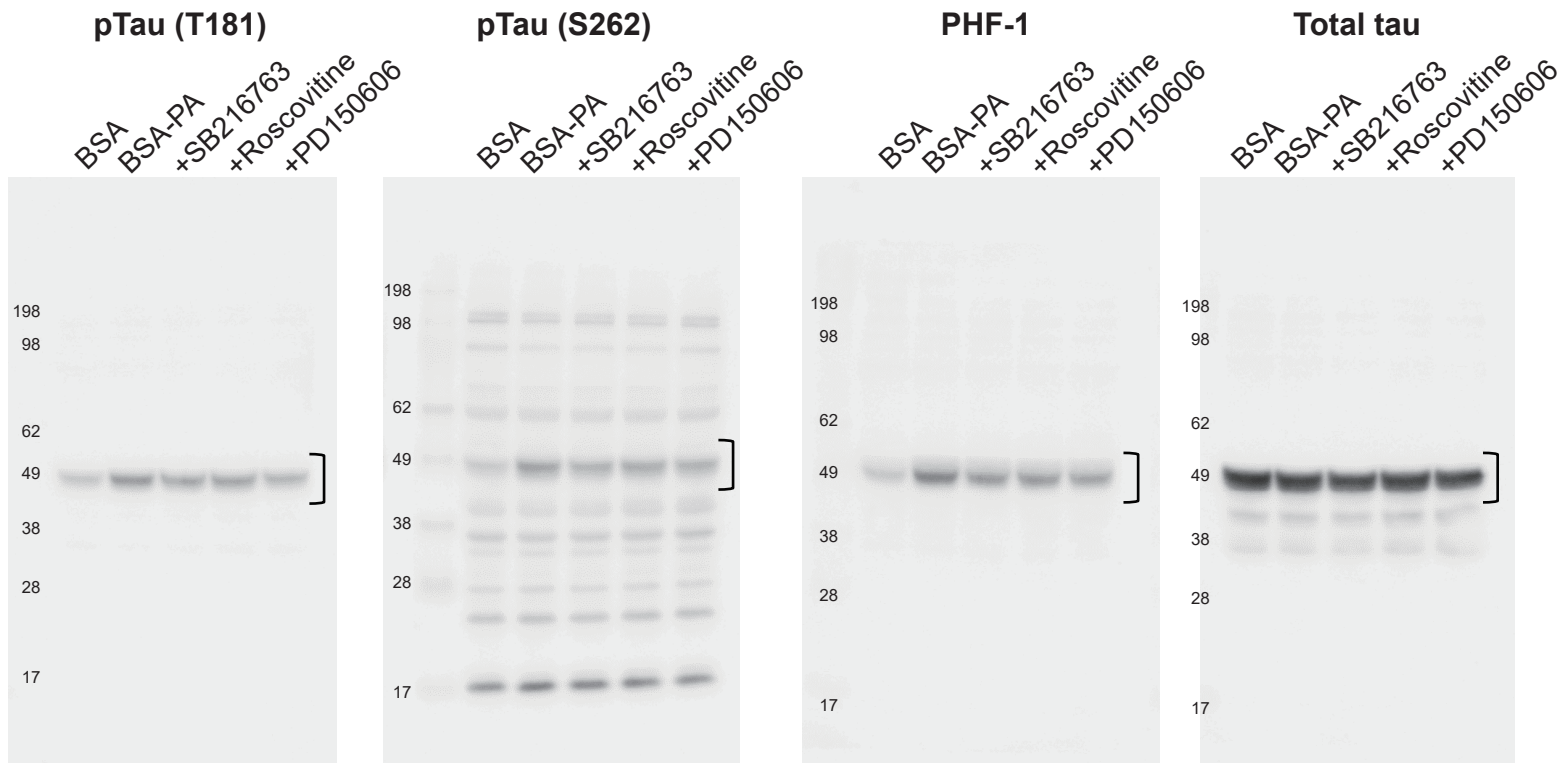

Cropped region

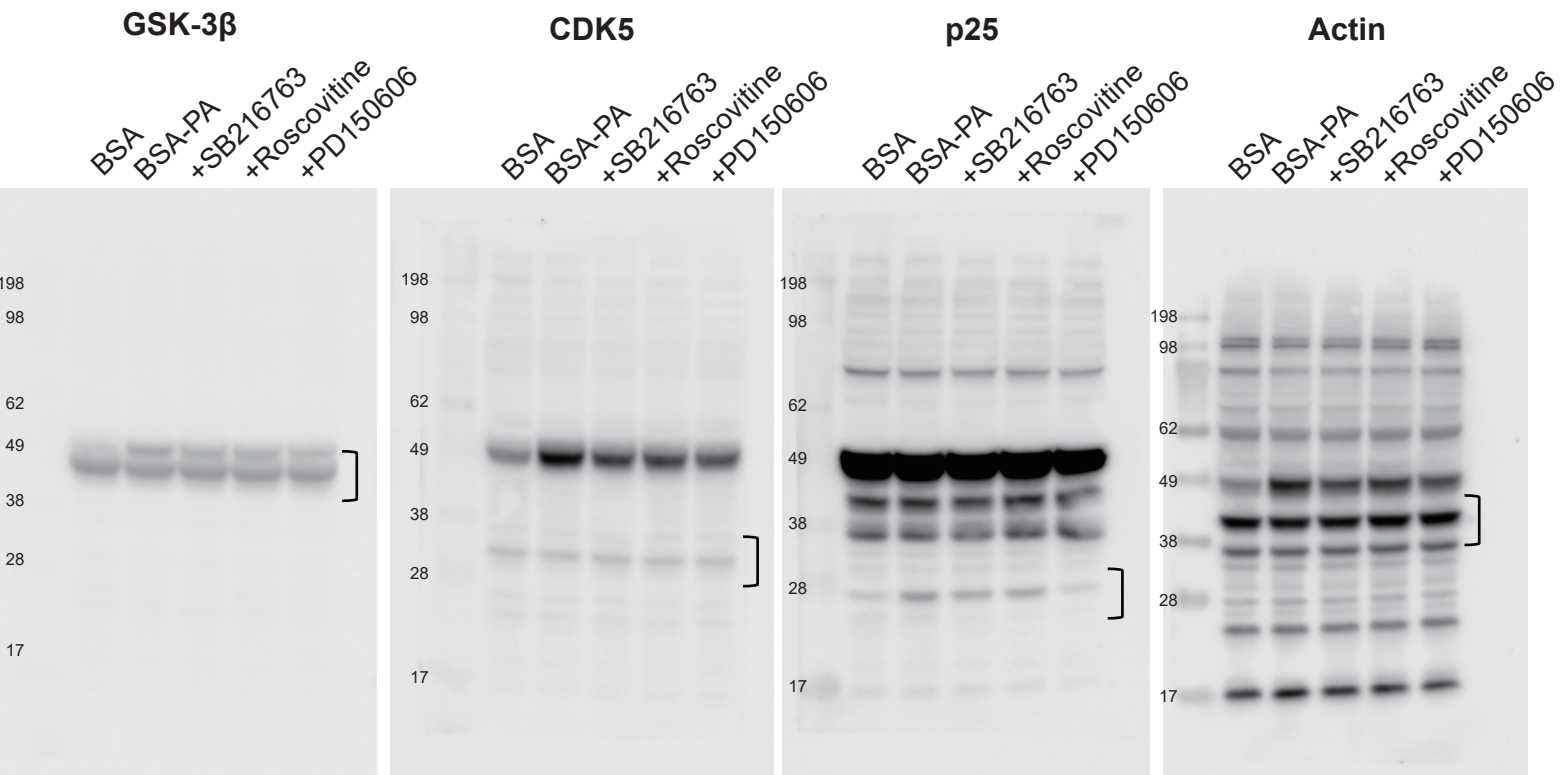

Cropped region
